# Supplementary material for: Biallelic TET2 mutations confer sensitivity to 5′-azacitidine in acute myeloid leukemia
Source: JCI journal article supplement (doi:10.1172/jci.insight.150368), 2022-12-08
Supplement: sd1 [file 1]

# **Biallelic *TET2* mutation sensitises to 5'-azacitidine in acute myeloid leukemia**

Friedrich Stölzel, Sarah E. Fordham, Devi Nandana, Wei-Yu Lin, Helen Blair, Claire Elstob, Hayden L. Bell, Brigitte Mohr, Leo Ruhnke, Desiree Kunadt, Claudia Dill, Daniel Allsop, Rachel Piddock, Emmanouela-Niki Soura, Catherine Park, Mohd Fadly, Thahira Rahman, Abrar Alharbi, Manja Wobus, Heidi Altmann, Christoph Röllig, Lisa Wagenführ, Gail L. Jones, Tobias Menne, Graham H. Jackson, Helen J. Marr, Jude Fitzgibbon, Kenan Onel, Manja Meggendorfer, Amber Robinson, Zuzanna Bziuk, Emily Bowes, Olaf Heidenreich, Torsten Haferlach, Sara Villar, Beñat Ariceta, Rosa Ayala Diaz, Steven Altschuler, Lani Wu, Felipe Prosper, Pau Montesinos, Joaquin Martinez-Lopez, Martin Bornhäuser and James M. Allan

## **SUPPLEMENTARY MATERIALS**

Figure. S1. Disease infiltration in the AML index case.

Figure. S2. Sanger sequencing of *TET2* exon 3 in the index AML case.

Figure. S3. Sanger sequencing of *NPM1* exon 11 in the index AML case.

Figure. S4. Sanger sequencing of *FLT3* exon 14 in the index AML case.

Figure. S5. Sanger sequencing of *TET2* exon 6 in HEL AML cells.

Figure. S6. Cell cycle analysis of *TET2* mutant HEL AML cells following 5'-azacitidine treatment.

Figure. S7. Validation of qPCR assay for detection of WT and CRISPR-Cas9-mutated *TET2* alleles.

Figure. S8. Preferential engraftment of *TET2*-null cells in the spleen of *Rag2*<sup>-/-</sup> *Il2rg*<sup>-/-</sup> mice.

Figure S9. Abrogation of *TET2* expression in THP-1 and KG-1 cells affects cellular response to 5'-azacitidine.

Figure S10. Effect of ABCB1 inhibition with Verapamil on sensitivity to 5'-azacitidine in HEL AML cell clones with monoallelic or biallelic *TET2* mutation.

Figure S11. Effect of ABCB1 inhibition with Tariquidar on sensitivity to 5'-azacytidine in HEL AML cell clones with monoallelic or biallelic *TET2* mutation.

Figure. S12. High density SNP array copy number profile of chromosome 4 from leukemic blast cells of AML patients UPN25, UPN28 and UPN30.

Table S1. Karyotypes of cell lines used in the study.

Table S2. Significantly differentially methylated CpGs ( $P < 0.05$ ) in HEL cell clones with biallelic *TET2* mutations compared to parental clones with monoallelic *TET2* mutation.

Table S3. Significantly differentially expressed genes ( $P < 0.05$  and  $|\text{Log}_2\text{FC}| \geq 0.3$ ) in HEL cell clones with biallelic *TET2* mutations compared to parental clones with monoallelic *TET2* mutation.

Table S4. Gene ontology component analysis of significantly differentially expressed genes in HEL cell clones with biallelic *TET2* mutations compared to parental clones with monoallelic *TET2* mutation.

Table S5. Significantly differential expression ( $P < 0.05$ ) of components of the snRNP complex (GO:0097525) in HEL cell clones with biallelic *TET2* mutations compared to parental clones with monoallelic *TET2* mutation.

Table S6. Gene ontology biological pathway analysis of significantly differentially expressed genes in HEL cell clones with biallelic *TET2* mutations compared to parental clones with monoallelic *TET2* mutation.

Table S7. Clinical characteristics and demographics of AML patients with a cytogenetically discernible chromosome 4 aberration (from SAL AML Biobank).

Table S8. Clinical characteristics and demographics of AML patients with *TET2* mutation enrolled in the PETHEME FLUGAZA phase 3 clinical trial.

Table S9. Primer sequences and PCR reaction conditions for Sanger sequencing of genes of interest.

**Figure. S1**

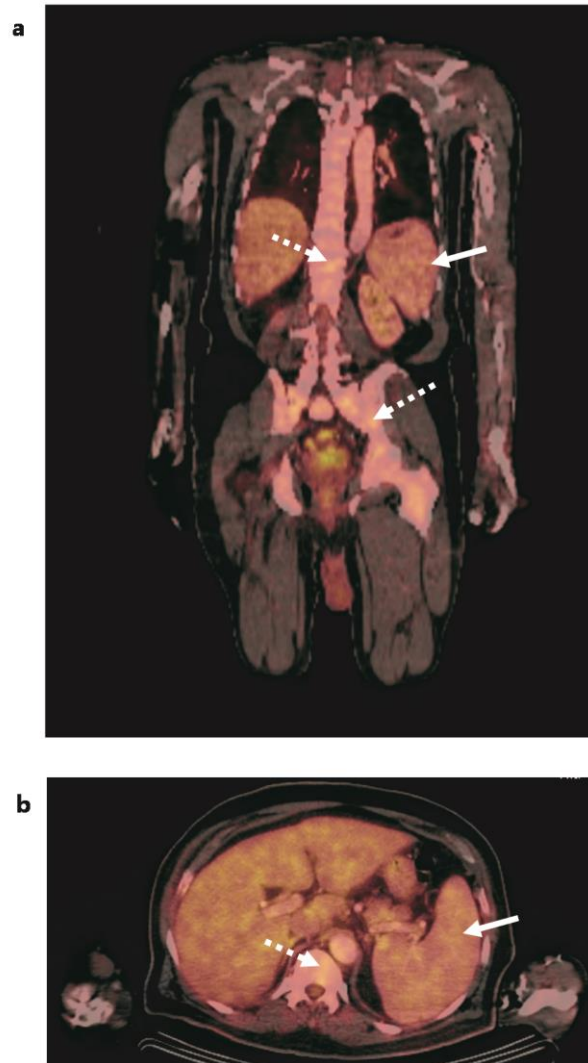

**Figure. S1. Disease infiltration in the AML index case.**

Coronal (**a**) and transversal (**b**) fused multiplanar reconstruction of  $^{18}\text{F}$ Fluorodesoxy-Glucose Positron Emission Tomography – Computed Tomography imaging of the index AML patient (UPN01) at diagnosis, prior to induction chemotherapy. Splenomegaly (measuring  $16.5 \times 11 \times 5.5$  cm) is indicated by solid arrows. Enhanced hypermetabolic and focal uptake in the vertebrae and pelvic bone (dotted arrows) corresponds to the AML diagnosed in bone marrow and peripheral blood of the patient. Images courtesy of Professor Jörg Kotzerke (Technical University of Dresden, Germany).

**Figure. S2**

Presentation (BM)

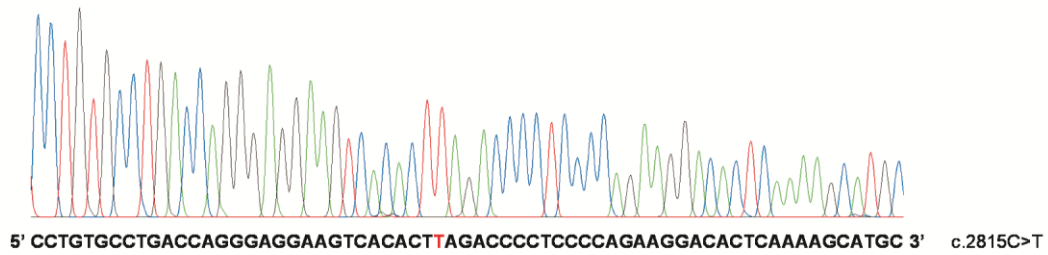

Remission (saliva)

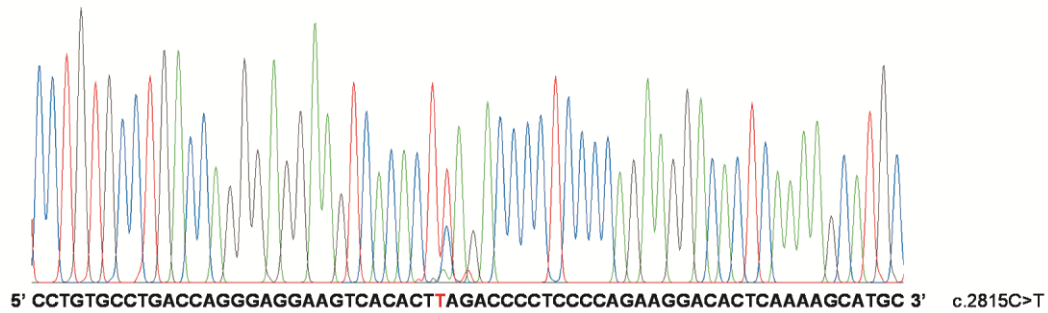

Relapse (BM)

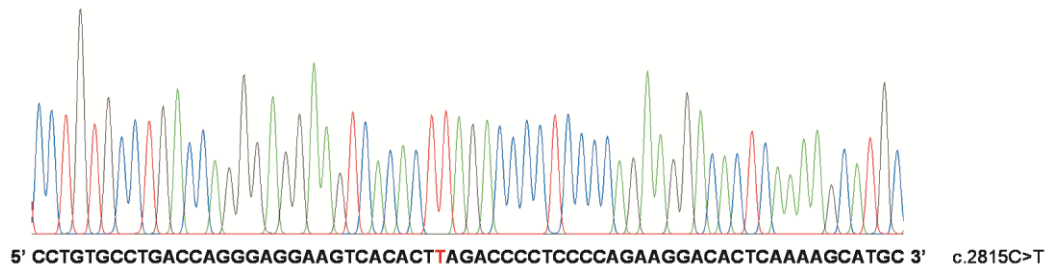

**Figure. S2. Sanger sequencing of *TET2* exon 3 in the index AML case.**

Sanger sequencing results for index AML patient at presentation (top), remission (middle) and relapse (bottom). A 65 bp section of forward read of *TET2* exon 3 surrounding the mutated base is shown in each case. The mutated base is shown in red. BM, bone marrow.

**Figure. S3**

Presentation (BM)

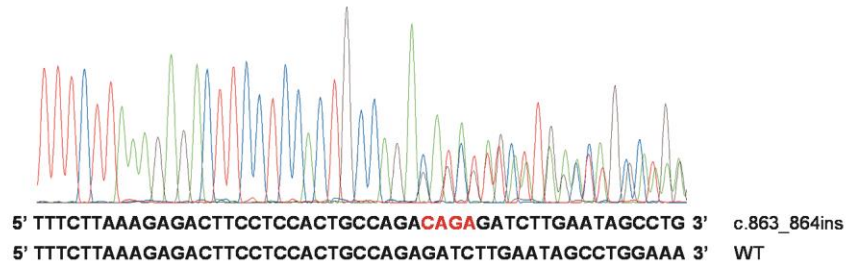

Remission (saliva)

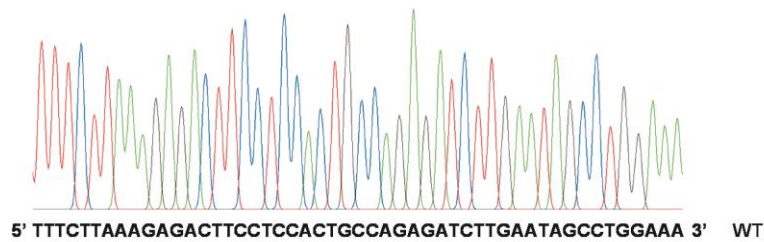

Relapse (BM)

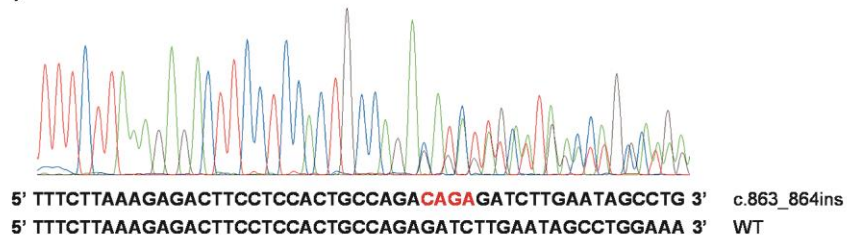

**Figure. S3. Sanger sequencing of *NPM1* exon 11 in the index AML case.**

Sanger sequencing results for index AML patient at presentation (top), remission (middle) and relapse (bottom). A 50 bp section of reverse complement read of *NPM1* exon 11 surrounding the insertion site is shown in each case. The 4 bp inserted sequence is shown in red. BM, bone marrow.

**Figure. S4**

Presentation (BM)

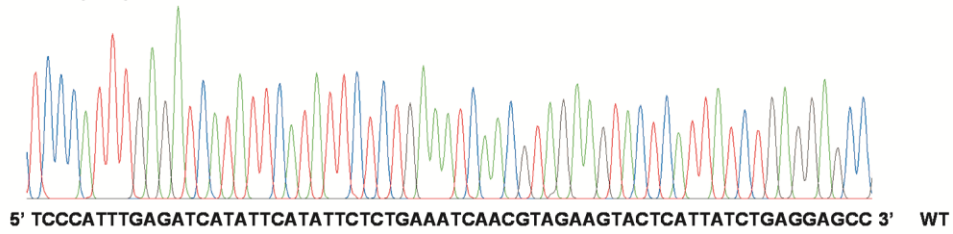

Remission (saliva)

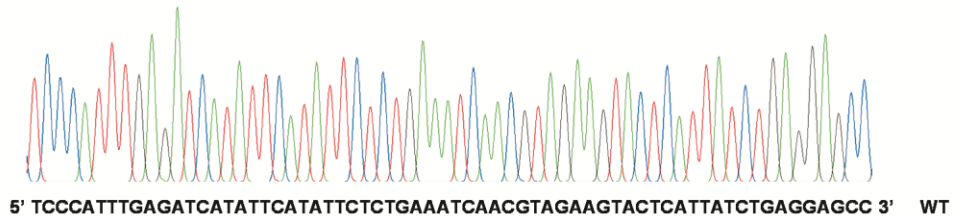

Relapse (BM)

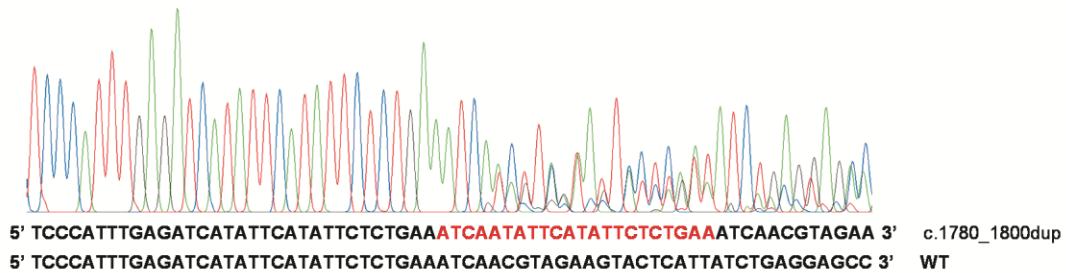

**Figure. S4. Sanger sequencing of *FLT3* exon 14 in the index AML case.**

Sanger sequencing results for index AML patient at presentation (top), remission (middle) and relapse (bottom). A 65 bp section of reverse complement read of *FLT3* exon 14 surrounding the duplication is shown in each case. The 21 bp duplicated sequence is shown in red. BM, bone marrow.

**Figure. S5**

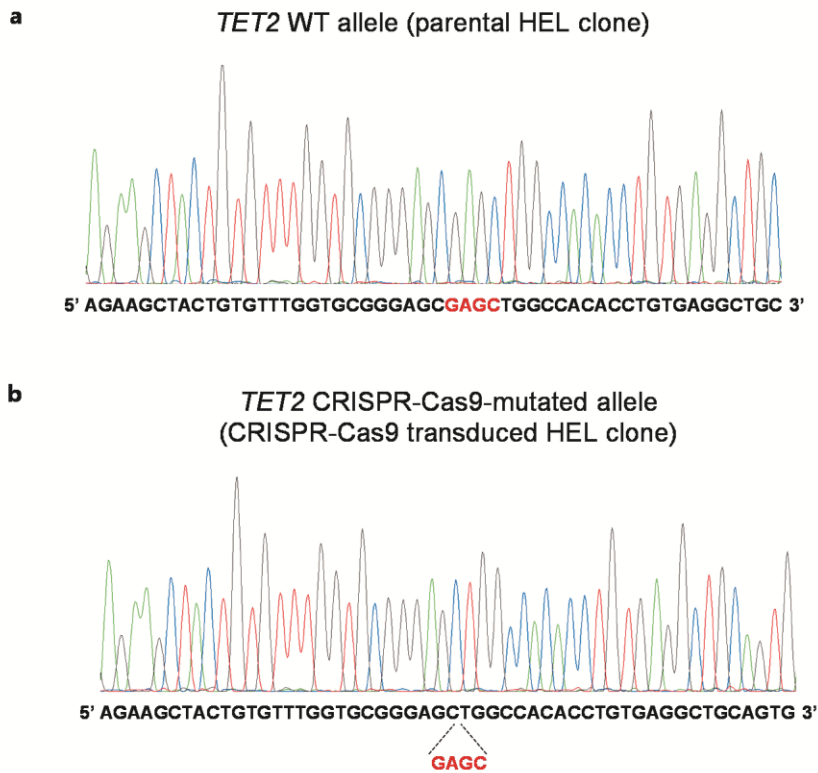

**Figure. S5. Sanger sequencing of *TET2* exon 6 in HEL AML cells.**

(a) Sanger sequencing of *TET2* exon 6 in a representative parental *TET2* HEL cell clone with WT sequence. (b) Sanger sequencing of *TET2* exon 6 in a *TET2* CRISPR-Cas9 transduced HEL cell clone with a 4bp deletion (highlighted in red).



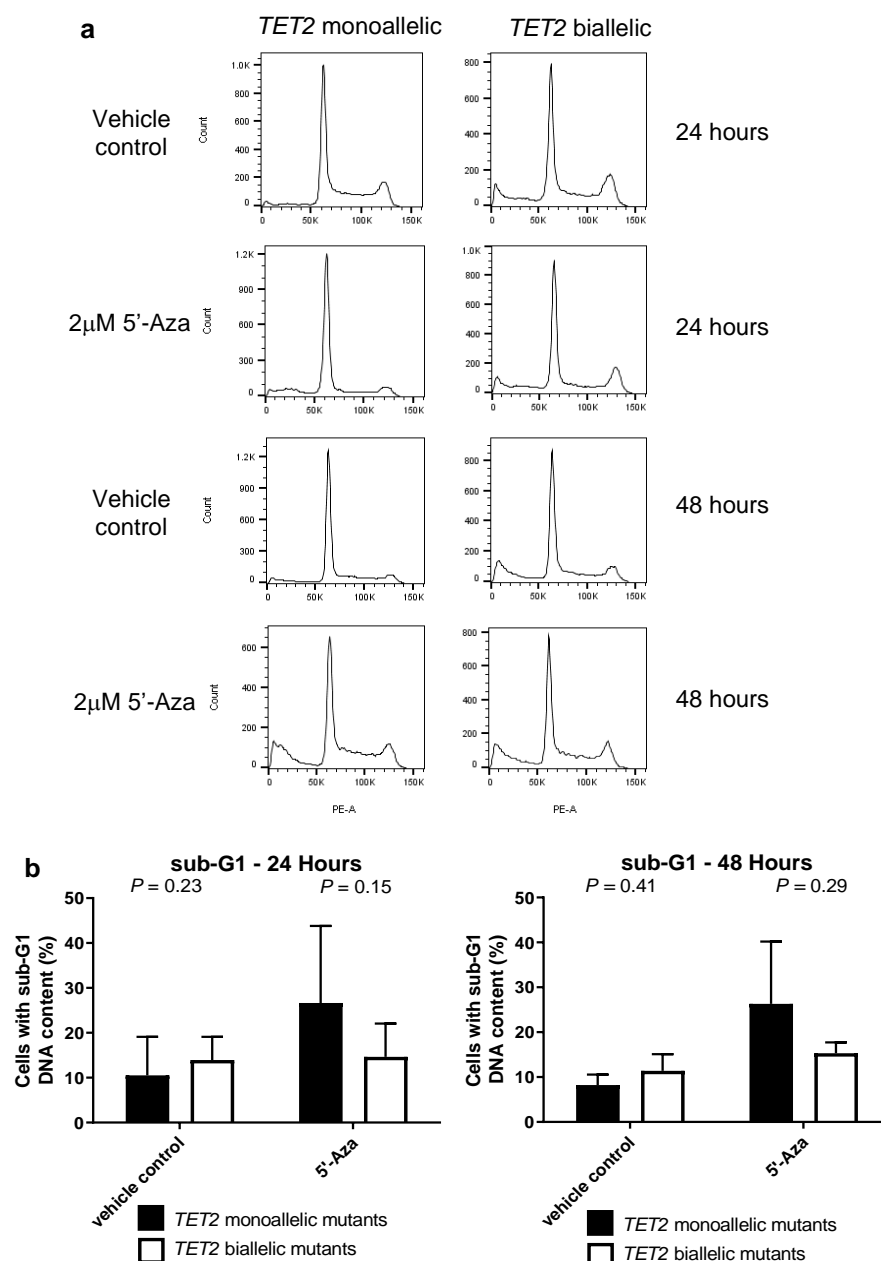

**Figure. S6. Cell cycle apoptosis analysis of *TET2* mutant HEL AML cells following 5'-azacitidine treatment.**

(a) HEL AML cell clones with monoallelic (left) or biallelic (right) *TET2* mutation were cultured with 2  $\mu$ M 5'-azacitidine or vehicle control. Cellular DNA content (PE-A) at 24 and 48 hours incubation was determined using flow cytometry of propidium iodide-stained cells to identify cells with sub-G1 DNA content as a marker of apoptosis. (b) *TET2* monoallelic mutant (closed symbols) and *TET2* biallelic mutant (open symbols) HEL AML cells with sub-G1 DNA content were quantified at 24 hours (left panel) and 48 hours (right panel) following incubation with 2  $\mu$ M 5'-azacitidine or vehicle control. Data are derived from 3 independent experiments. 5'-Aza, 5'-azacitidine; Count, cell count; PE-A, phycoerythrin-area.

**Figure. S7**

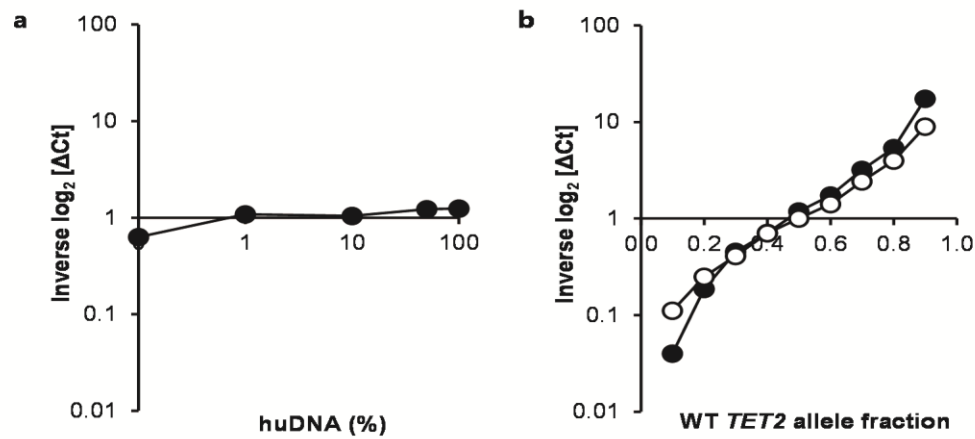

**Figure. S7. Validation of qPCR assay for detection of WT and CRISPR-Cas9-mutated *TET2* alleles.**

(a) Using a custom designed Taqman SNP Genotyping assay (see Methods), human DNA (huDNA) (from an equal mix of HEL *TET2* monoallelic and HEL *TET2* biallelic cells) was amplified in the presence of murine DNA in varying proportions and relative expression of the WT versus the mutated *TET2* allele (expressed as inverse  $\log_2 [\Delta Ct]$ ) was calculated. Equal amplification of both alleles is represented by a value of 1, whereas dominance of the WT or mutant allele is represented by inverse  $\log_2 [\Delta Ct]$  values  $>1$  or  $<1$ , respectively. As shown, amplification of huDNA was robust even when present at only 0.1% in murine DNA. Furthermore, no significant amplification bias of either WT or CRISPR-Cas9-mutated *TET2* alleles was observed. Amplification of either allele did not occur when only murine DNA was present in the reaction, confirming the assay to be specific for huDNA. Data represents the mean of triplicate reactions. (b) HEL *TET2* monoallelic and HEL *TET2* biallelic cells were mixed in varying ratios and extracted DNA was amplified using the custom Taqman SNP Genotyping assay as above. Closed circles demonstrate the actual experimentally-derived data (shown are means of triplicate reactions) and open circles represent the hypothetical data, assuming perfect amplification of both alleles at the designated ratios. As shown, there was no significant allele amplification bias when clones were mixed at ratios between 1:4 (WT allele fraction = 0.2) and 4:1 (WT allele fraction = 0.8). However, at ratios of 1:9 (WT allele fraction = 0.1) and 9:1 (WT allele fraction = 0.9) there was modest amplification bias in favour of the more abundant allele, presumably due to allelic drop-out of the less abundant allele.

**Figure. S8**

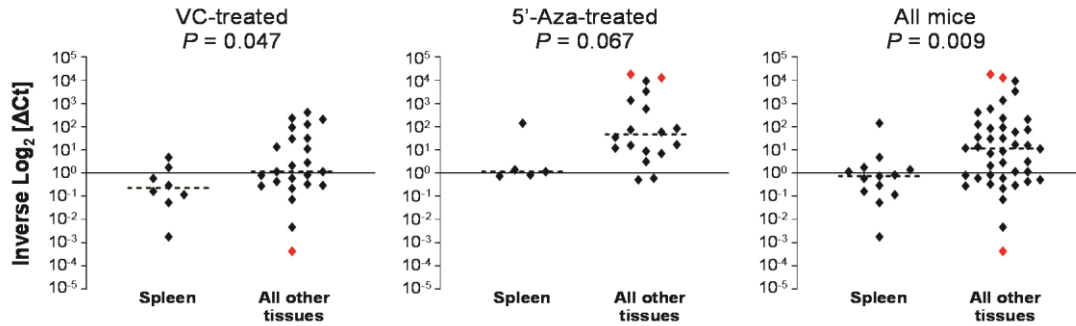

**Figure. S8. Preferential engraftment of *TET2*-null cells in the spleen of *Rag2*<sup>-/-</sup>*Il2rg*<sup>-/-</sup> mice.**

HEL *TET2* monoallelic and HEL *TET2* biallelic cell clones were co-injected in a 1:1 ratio into the femurs of *Rag2*<sup>-/-</sup>*Il2rg*<sup>-/-</sup> mice. Treatment with 5-Aza (5mg/kg daily for 5 days) or VC was initiated on day 28 (post-injection) and tissues were harvested on day 35 for analysis by custom *TET2* allele-specific qPCR assay. Shown are inverse  $\text{Log}_2 [\Delta\text{Ct}]$  values which represent relative expression of the WT versus the 4bp deleted *TET2* allele in individual samples and are the means of triplicate reactions. Inverse  $\text{Log}_2 [\Delta\text{Ct}]$  of 1 indicates a 1:1 ratio between the WT and 4bp deleted *TET2* alleles (and hence HEL *TET2* monoallelic and HEL *TET2* biallelic clones), whereas inverse  $\text{Log}_2 [\Delta\text{Ct}] > 1$  or inverse  $\text{Log}_2 [\Delta\text{Ct}] < 1$  indicates dominance of the WT (HEL *TET2* monoallelic) or 4bp deleted (HEL *TET2* biallelic) allele, respectively. Red points indicate samples which were dominated entirely by one cell clone. Horizontal dashed lines represent median inverse  $\text{Log}_2 [\Delta\text{Ct}]$  values. *P* values comparing inverse  $\text{Log}_2 [\Delta\text{Ct}]$  values from spleens versus all other tissues (BM, PB and tumours) in VC-treated (left), 5'-Aza-treated (center) or all mice regardless of treatment (right) were calculated using the Mann-Whitney test. VC, vehicle control.

**Figure. S9**

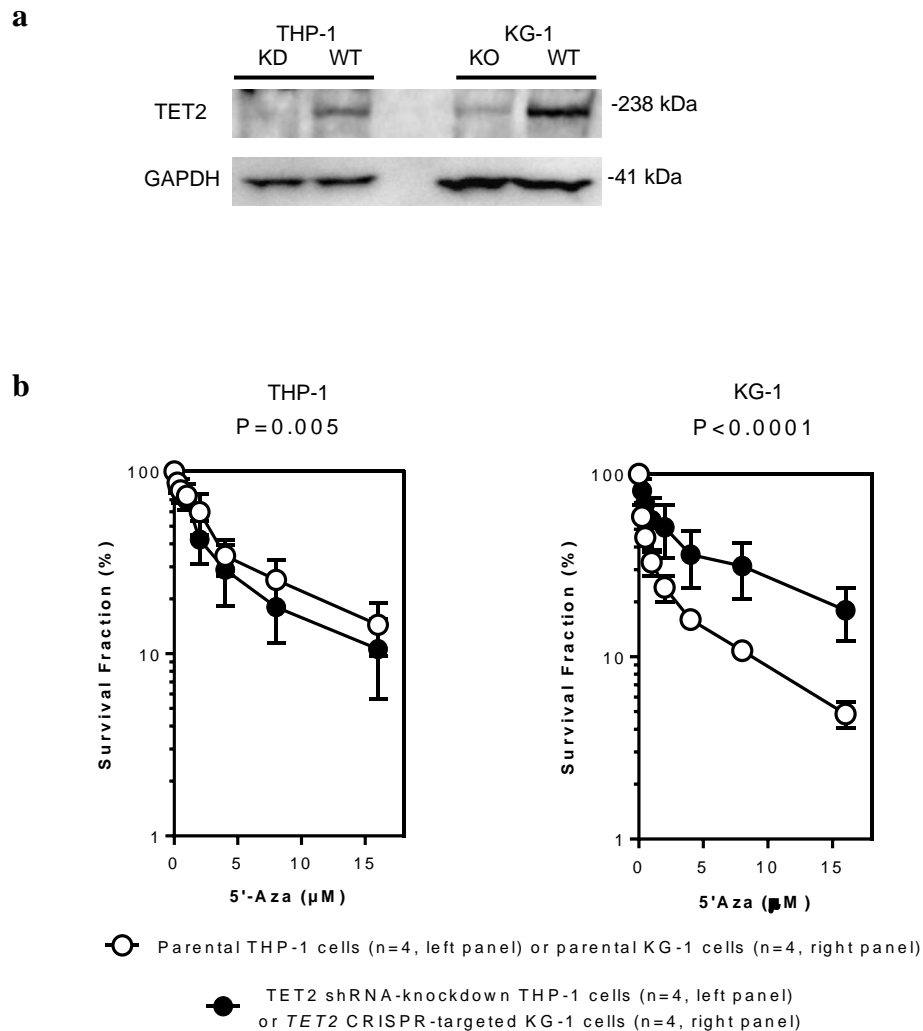

**Figure. S9. Abrogation of TET2 expression in THP-1 and KG-1 cells affects cellular response to 5'-azacitidine**

(a) Immunoblot showing TET2 protein expression in THP-1 cells with shRNA-mediated knockdown (KD) of TET2 and in KG-1 cells with CRISPR-targeted knockout (KD) of *TET2*. (b) Parental THP-1 cells (left panel, open circles), parental KG-1 cells (right panel, open circles), TET2 shRNA knockdown THP-1 cells (left panel, filled circles) and CRISPR-Cas9-targeted TET2 KG-1 cells (right panel; filled circles) were treated with 5'-Aza. Cell density (relative to respective vehicle control-treated cells) was determined after 96 hrs. Data represents mean and SD of four independent experiments. *P* values calculated by two-way ANOVA.

**Figure. S10**

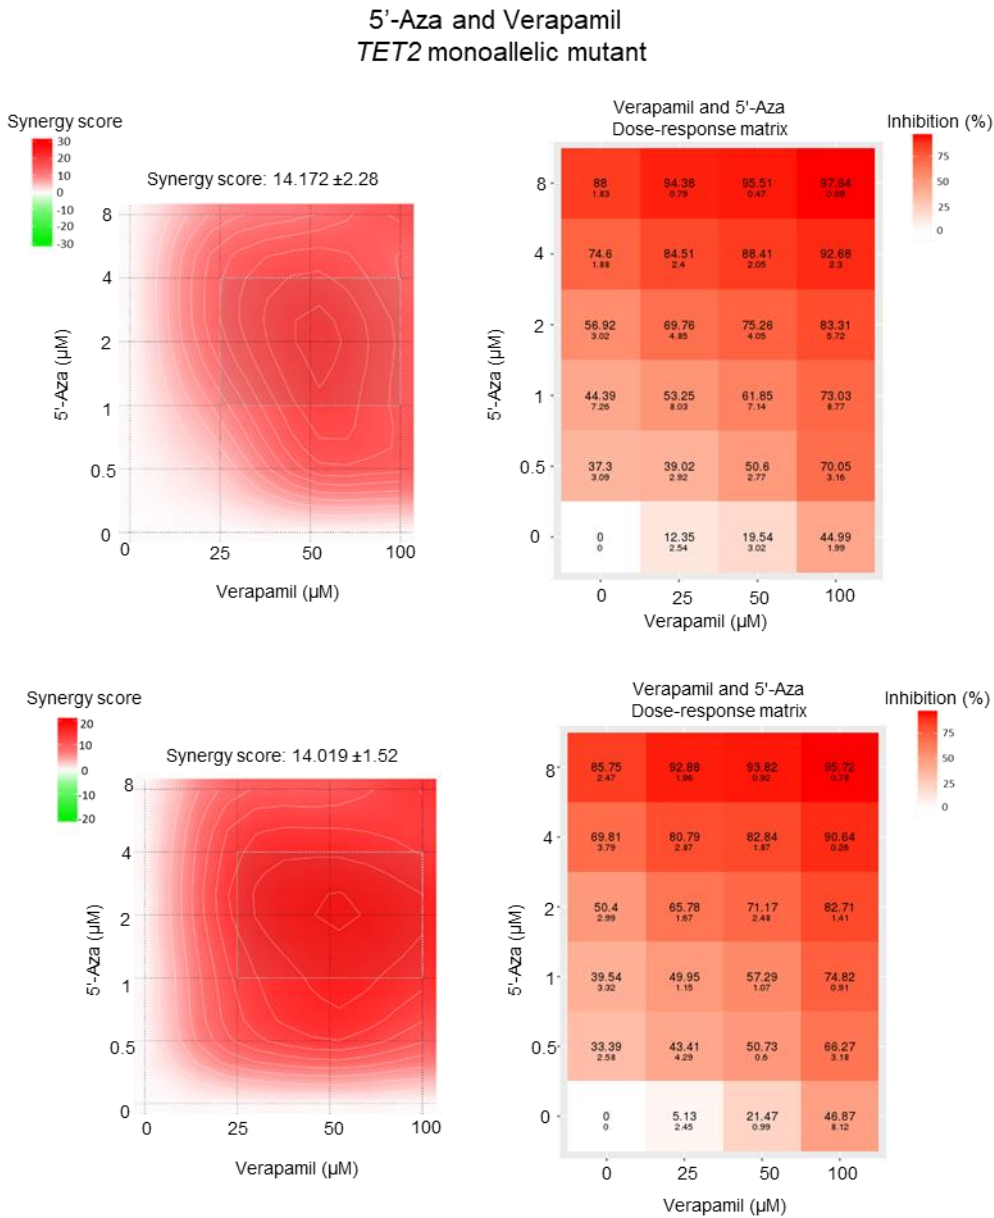

**Figure S10. Effect of ABCB1 inhibition with Verapamil on sensitivity to 5'-azacitidine in HEL AML cell clones with monoallelic or biallelic *TET2* mutation (continued on next page).** Synergy maps (left) show the synergy scores and the dose-response matrices (right) show HEL cell growth inhibition for 5'-Azacitidine in combination with Verapamil stratified by *TET2* mutant allele dosage (*TET2* monallelic mutant clones (N=2, this page) and *TET2* biallelic mutant allele clones (N=2, next page)).

**Figure S10 (continued)**

**5'-Aza and Verapamil  
*TET2* biallelic mutant**

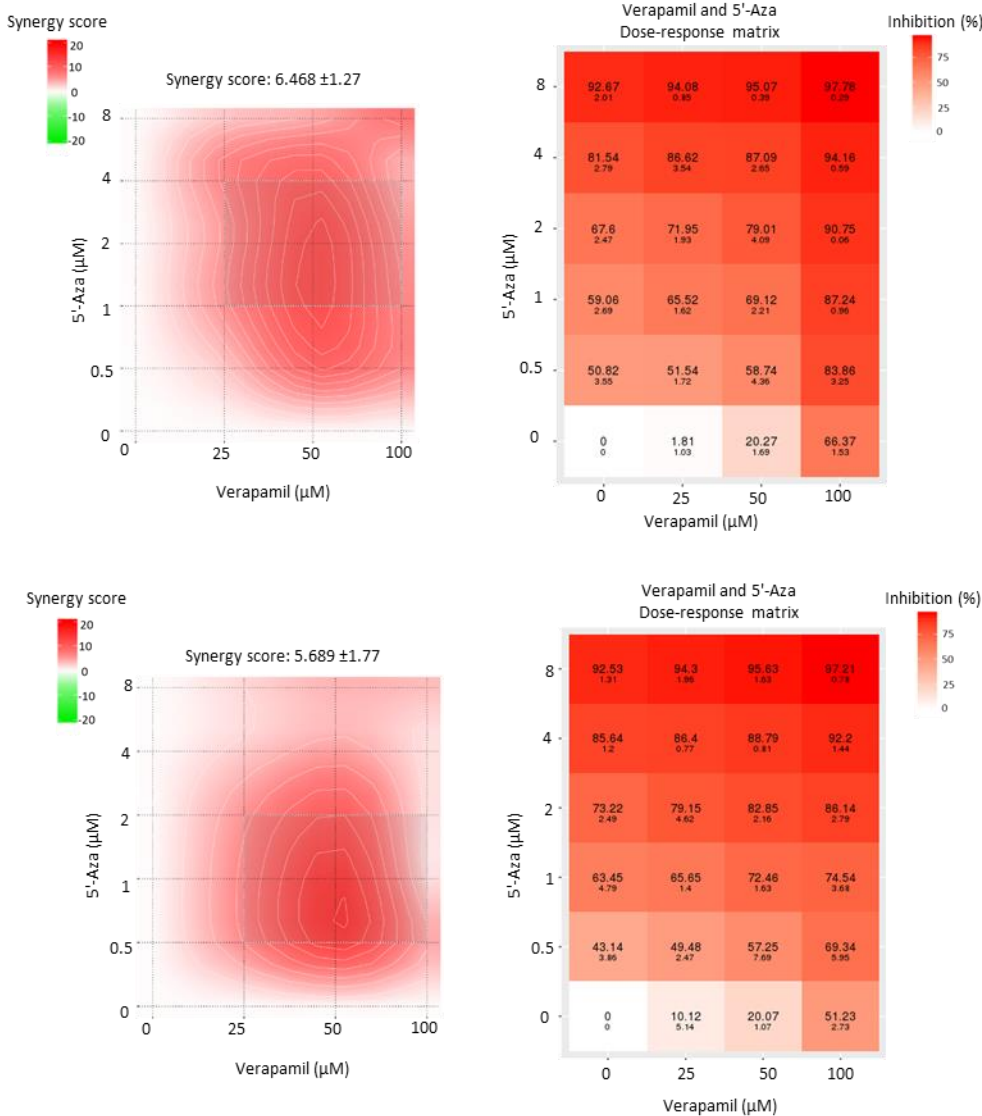

**Figure S10. Effect of ABCB1 inhibition with Verapamil on sensitivity to 5'-azacitidine in HEL AML cell clones with monoallelic or biallelic *TET2* mutation (continued from previous page).**

Synergy maps (left) show the synergy scores and the dose-response matrices (right) show HEL cell growth inhibition for 5'-Azacitidine in combination with Verapamil stratified by *TET2* mutant allele dosage (*TET2* monallelic mutant clones (N=2, previous page) and *TET2* biallelic mutant allele clones (N=2, this page)).

**Figure S11.**

**5'-Aza and Tariquidar  
*TET2* monoallelic mutant**

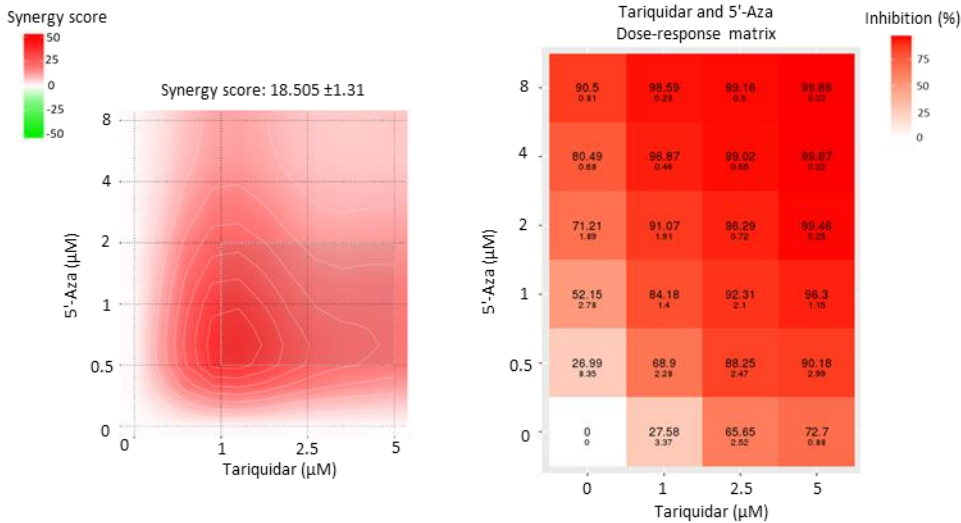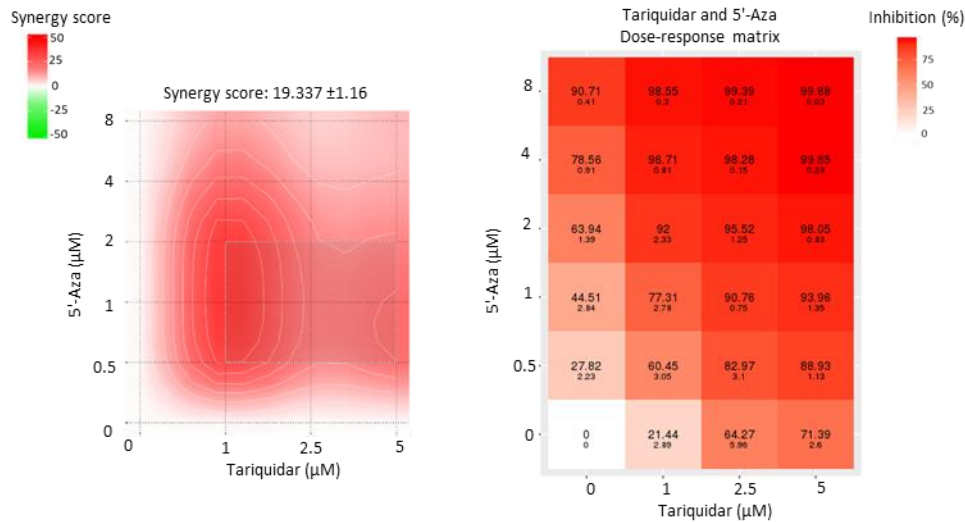

**Figure S11. Effect of ABCB1 inhibition with Tariquidar on sensitivity to 5'-azacitidine in HEL AML cell clones with monoallelic or biallelic *TET2* mutation (continued on next page).** Synergy maps (left) show the synergy scores and the dose-response matrices (right) show HEL cell growth inhibition for 5'-Azacitidine in combination with Tariquidar stratified by *TET2* mutant allele dosage (*TET2* monoallelic mutant clones (N=2, this page) and *TET2* biallelic mutant allele clones (N=2, next page)).

**Figure S11 (continued)**

**5'-Aza and Tariquidar  
*TET2* biallelic mutant**

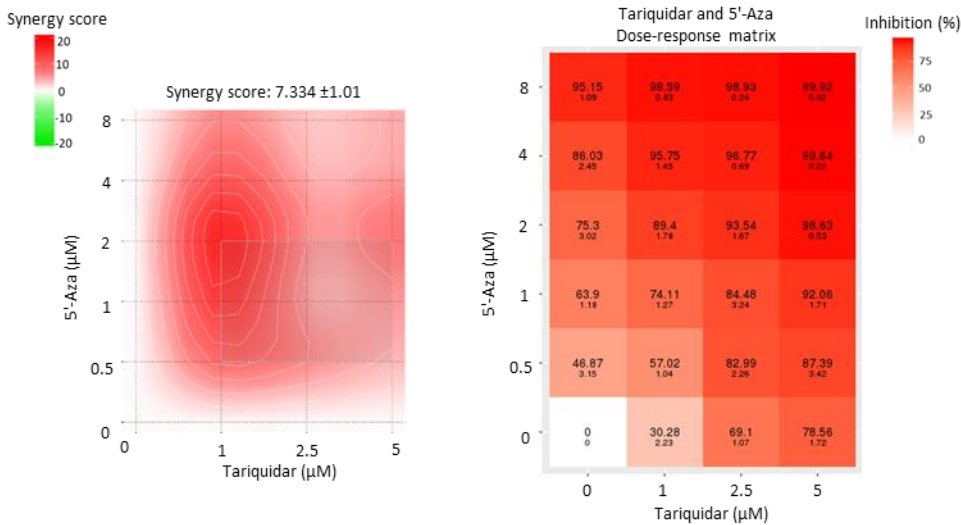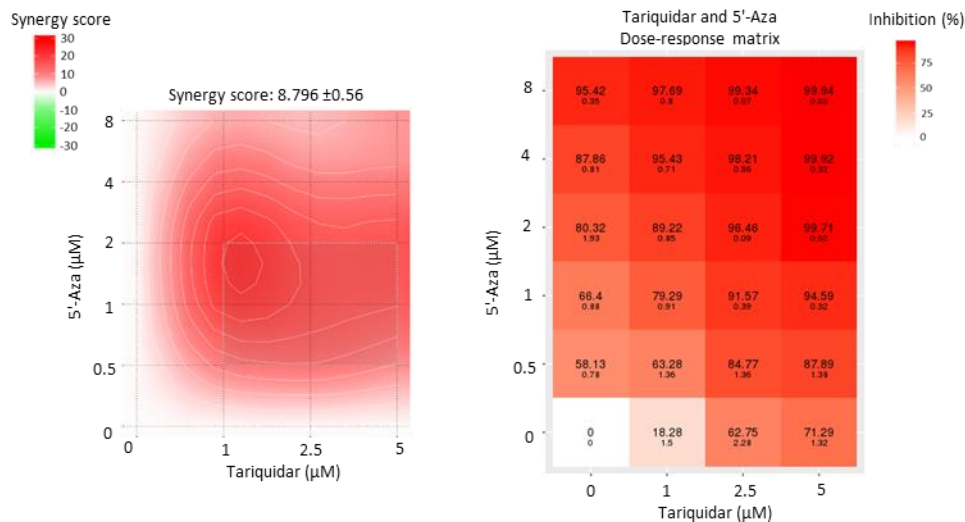

**Figure S11. Effect of ABCB1 inhibition with Tariquidar on sensitivity to 5'-azacitidine in HEL AML cell clones with monoallelic or biallelic *TET2* mutation (continued from previous page).**

Synergy maps (left) show the synergy scores and the dose-response matrices (right) show HEL cell growth inhibition for 5'-Azacitidine in combination with Tariquidar stratified by *TET2* mutant allele dosage (*TET2* monoallelic mutant clones (N=2, previous page) and *TET2* biallelic mutant allele clones (N=2, this page)).



**Figure. S12**

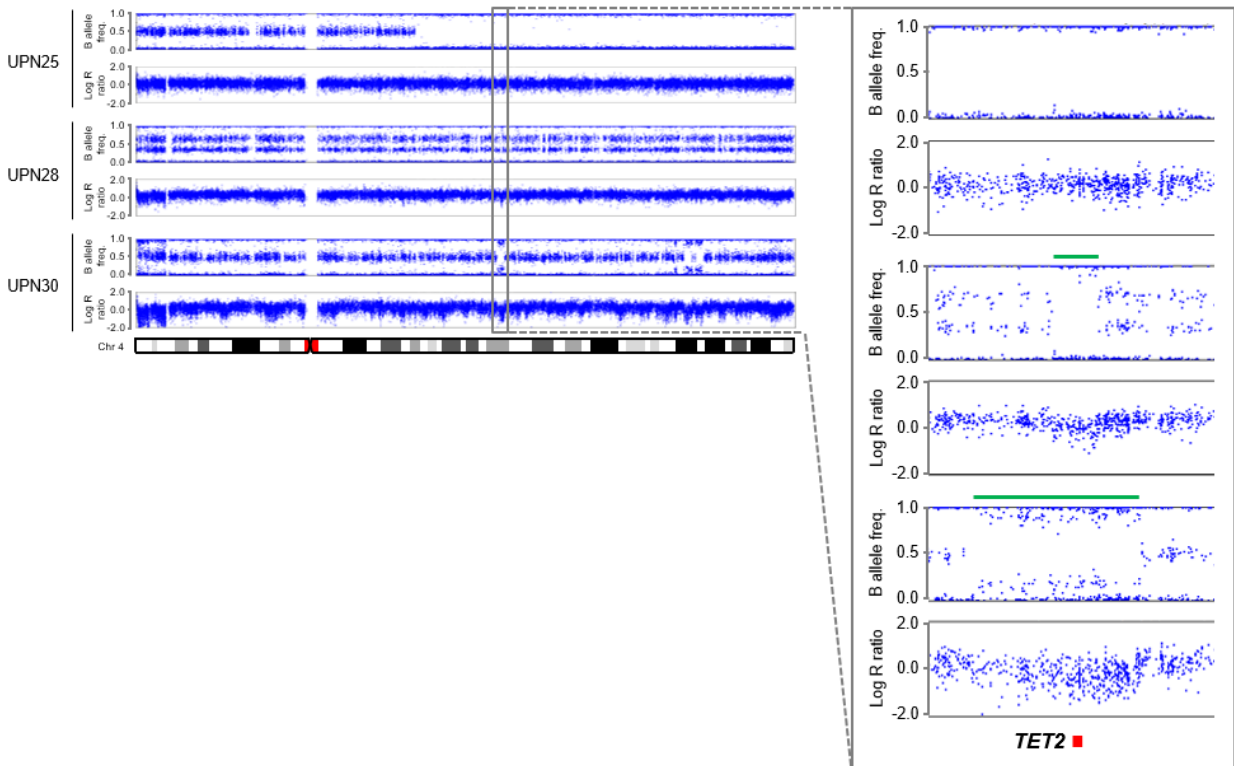

**Figure. S12. High density SNP array copy number profile of chromosome 4 from leukemic blast cells of AML patients UPN25, UPN28 and UPN30.**

Points represent individual SNPs which are aligned relative to their position on chromosome 4 (indicated by the ideogram below the plots). Copy number is measured as Log R ratio, with a value of 0 indicating a diploid SNP and positive and negative values indicating copy number gain and loss, respectively. B allele frequency represents the ratio of the two alleles of each SNP such that a value of 0.5 indicates allele heterozygosity and values of 0 and 1 indicate homozygosity. Inset shows expanded view of the region indicated by the grey box. Green bars highlight focal deletions within 4q24 in two of the patients. The location of *TET2* is shown below the plots.

**Table S1. Karyotypes of cell lines used in the study.**

| Cell line                                                                                                                                                                                                                    | Karyotype                                                                                                                                                                                                                                                                                                                                                                  |
|------------------------------------------------------------------------------------------------------------------------------------------------------------------------------------------------------------------------------|----------------------------------------------------------------------------------------------------------------------------------------------------------------------------------------------------------------------------------------------------------------------------------------------------------------------------------------------------------------------------|
| AML-2                                                                                                                                                                                                                        | 48(43-49)<2n>XY, +6, +8, der(1)inv(1)(p36q31)t(1;6) (q13;p12), der(2)t(2;17)(p23;q24.1)del(2)(q14.2q36), der(3)t(1;3)(p36;p25), ins(3;2)(q21;q14.2q36), t(5;8)(q11.2;q24), der(6)t(1;6)(q31;p12)t(3;6) (q26;q24), inv(12)(p13.3q13.2), t(13;14)(q32/33;q24.2), der(17)t(2;17)(p23;q24.1) <sup>a</sup>                                                                      |
| AML-3                                                                                                                                                                                                                        | 48(45-50)<2n>X/XY, +1, +5, +8, der(1)t(1;18)(p11;q11), i(5p), del(13)(q13q21), dup(17)(q21q25) <sup>a</sup>                                                                                                                                                                                                                                                                |
| THP-1                                                                                                                                                                                                                        | 94(88-96)<4n>XY/XXY, -Y, +1, +3, +6, +6, -8, -13, -19, -22, -22, +2mar, add(1)(p11), del(1)(q42.2), i(2q), del(6)(p21)x2-4, i(7p), der(9)t(9;11)(p22;q23)i(9)(p10)x2, der(11)t(9;11)(p22;q23)x2, add(12)(q24)x1-2, der(13)t(8;13)(p11;p12), add(?18)(q21) <sup>a</sup>                                                                                                     |
| Kasumi-1                                                                                                                                                                                                                     | 45<2n>X, -Y, -9, -13, -16, +3mar, t(8;21)(q22;q22), der(9)t(9;?)(p22;?), der(15)t(?9;15)((?q11;?p11) <sup>a</sup>                                                                                                                                                                                                                                                          |
| HEL                                                                                                                                                                                                                          | 63(60-64)<3n>XXY, -2, -9, -10, -10, -11, -14, -16, -16, -17, -19, +20, +21, +2mar, del(2)(q32), t(3;6)(p13;q16), der(5)t(5;17)(q10;q10), der(6)t(1;6)(p13;p21), der(7)add(7)(p14;q32), add(8)(p21), der(9)t(9;?)(?11)(p24;?)(?q13), del(11)(q13), add(15)(p11), del(20)(q13), r(20)(p11q11), dup(21)(q11q22.3-qter), psu dic(22;9)t(9;?)(?22)(p24;?)(?p11-13) <sup>a</sup> |
| HL-60                                                                                                                                                                                                                        | 82-88<4n>XX, -X, -X, -8, -8, -16, -17, -17, +18, +22, +2mar, ins(1;8)(p?31;q24hsr)x2, der(5)t(5;17)(q11;q11)x2, add(6)(q27)x2, der(9)del(9)(p13)t(9;14)(q?22;q?22)x2, der(14)t(9;14)(q?22;q?22)x2, der(16)t(16;17)(q22;q22)x1-2, add(18)(q21) <sup>a</sup>                                                                                                                 |
| NB4                                                                                                                                                                                                                          | 78(71-81)<3n>XX, -X, +2, +6, +7, +7, +11, +12, +13, +14, +17, -19, +20, +4mar, der(8)t(8;?)(q24;?), der(11)t(11;?)(?->::11p15->11q22.1::11q13->22.1:), der(12)t(12;?)(p11;?), 14p+, t(15;17)(q22;q11-12.1), der(19)t(10;19)(q21.1;p13.3)x2 <sup>a</sup>                                                                                                                    |
| U937                                                                                                                                                                                                                         | 63(58-69)<3n>XXY, -2, -4, -6, +7, -9, -20, -21, +3mar, t(1;12)(q21;p13), der(5)t(1;5)(p22;q35), add(9)(p22), t(10;11)(p14;q23), i(11q), i(12p), add(16)(q22), add(19)(q13) <sup>a</sup>                                                                                                                                                                                    |
| MV4-11                                                                                                                                                                                                                       | 48, XY, t(4;11)(q21;q23), +8, +19 <sup>b</sup>                                                                                                                                                                                                                                                                                                                             |
| SKM1                                                                                                                                                                                                                         | 43(38-43)<2n>XY, +1, -12, -14, -20, -21, t(1;19)(q21;q13), del(2)(p11), del(9)(q12), add(17)(p1?) <sup>a</sup>                                                                                                                                                                                                                                                             |
| KG1                                                                                                                                                                                                                          | 45(42-47)<2n>X/XY, -4, +8, +8, -12, -17, -20, +2mar, der(5;17)(q10;q10)del(5)(q?11q?13), dup(7)(q12q33), del(7)(q22q35), i(8q)x2, der(8)t(6;8)(p11;q22), der(8)t(8;12)(p11;q13), der(11)t(1;11)(q13-21;p11-p13), der(16)t(?12;16)(?p13;q13/21) <sup>a</sup>                                                                                                                |
| <sup>a</sup> Data from <a href="https://www.dsmz.de/collection/catalogue/human-and-animal-cell-lines/catalogue">https://www.dsmz.de/collection/catalogue/human-and-animal-cell-lines/catalogue</a>                           |                                                                                                                                                                                                                                                                                                                                                                            |
| <sup>b</sup> Data from <a href="https://www.lgcstandards-atcc.org/products/all/CRL-9591.aspx?geo_country=gb#characteristics">https://www.lgcstandards-atcc.org/products/all/CRL-9591.aspx?geo_country=gb#characteristics</a> |                                                                                                                                                                                                                                                                                                                                                                            |

**Table S2. Significantly differentially methylated CpGs ( $P < 0.05$ ) in HEL cell clones with biallelic *TET2* mutations compared to parental clones with monoallelic *TET2* mutations.**

(Excel file)

**Table S3. Significantly differentially expressed genes ( $P_{\text{adj}} < 0.05$  and  $|\text{Log}_2\text{FC}| \geq 0.3$ ) in HEL cell clones with biallelic *TET2* mutations compared to parental clones with monoallelic *TET2* mutation identified.**

(Excel file)

**Table S4. Gene ontology component analysis of significantly differentially expressed genes in HEL cell clones with biallelic *TET2* mutations compared to parental clones with monoallelic *TET2* mutation.**

(Excel file)

**Table S5. Significantly differential expression ( $P_{\text{adj}} < 0.05$ ) of components of the snRNP complex (GO:0097525) in HEL cell clones with biallelic *TET2* mutations compared to parental clones with monoallelic *TET2* mutation.**

(Excel file)

**Table S6. Gene ontology biological pathway analysis of significantly differentially expressed genes in HEL cell clones with biallelic *TET2* mutations compared to parental clones with monoallelic *TET2* mutation.**

(Excel file)

**Table S7. Clinical characteristics and demographics of AML patients with a cytogenetically discernible chromosome 4 aberration (from SAL AML Biobank).**

| Patient ID         | Gender | Karyotype                                                                                                                                                                                                                                                      | Copy number alteration affecting 4q24 (from cytogenetics) | Age at diagnosis | ELN risk <sup>a</sup> | WBC count | Treatment <sup>b</sup> | CR  | ALL-SCT <sup>c</sup> | Relapse | OS (months) | Status (at last follow-up) | TET2 copy number alteration (from SNP array)      | TET2 base substitution (from Sanger sequencing) | TET2 loss of function mutation status |
|--------------------|--------|----------------------------------------------------------------------------------------------------------------------------------------------------------------------------------------------------------------------------------------------------------------|-----------------------------------------------------------|------------------|-----------------------|-----------|------------------------|-----|----------------------|---------|-------------|----------------------------|---------------------------------------------------|-------------------------------------------------|---------------------------------------|
| UPN01 (index case) | M      | 46,XY,t(4;12)(q27;q13)[12]/46,XY[10]                                                                                                                                                                                                                           | not discernible                                           | 76               | int                   | 38.2      | DA1, AZA               | no  | -                    | yes     | 27.9        | deceased                   | focal monoallelic deletion                        | c.2815C>T, p.Gln939*                            | biallelic                             |
| UPN02              | M      | 42~44,X,-Y,der(4)t(4;12)(q21;q24),del(5)(q13q33),-6,-11,der(12)t(6;12)(q21p12),t(12;6)(q13;q21),t(6;4)(q24;q25),-13,der(15)t(11;15)(q21;p11),t(11;15)(q21;q23),der(16)t(13;16)(q14;q12),-18,der(19)t(19;20)(q12;q12),der(20)t(15;20)(q23;q11)[cp19]/46,XY[1]   | negative                                                  | 50               | adv                   | 6.9       | DA1                    | yes | salvage              | yes     | 22.8        | deceased                   | negative                                          | negative                                        |                                       |
| UPN03              | F      | 46,XX,der(4)del(4)(q?11)t(4;?11)(q?11;q23q23),der(7)del(7)(q?11)t(7;?10)(q?11;p12),+8,der(10;11)(10qter->10p12::11q23->11q23:??11p11->11q13::4q?21->4qter)[8]                                                                                                  | negative                                                  | 22               | adv                   | 14.3      | DA1                    | yes | salvage              | yes     | 26.5        | deceased                   | negative                                          | negative                                        |                                       |
| UPN04              | M      | 46,XY,der(3)inv(3)(q21q26)add(3)(p25),t(4;6)(q35;q23),del(7)(q21q31),t(8;21)(q22;q22),add(14)(q32.1),add(15)(q24)[11]/45,X,-Y,der(3)inv(3)(q21q26)add(3)(p25),t(4;6)(q35;q23),del(7)(q21q31),t(8;21)(q22;q22),add(14)(q32.1),add(15)(q24)[9]                   | negative                                                  | 40               | fav                   | 21.9      | DA1, DA2               | yes | post-CR              | yes     | 76.8        | alive                      | negative                                          | negative                                        |                                       |
| UPN05              | F      | 46,XX,t(4;22)(q25;q13)[5]/46,XX[20]                                                                                                                                                                                                                            | negative                                                  | 57               | int                   | 25.8      | DA1, DA2, MAC, MAMAC   | yes | salvage              | yes     | 12.6        | deceased                   | negative                                          | negative                                        |                                       |
| UPN06              | M      | 42,XY,+der(1)t(1;16),del(2),?der(3)t(3;15),?+del(4),-5,der(7)t(7;22),der(7)t(2;7;16),?t(8q),-9,der(12)t(5;12),-15,-16,-17,t(17;18),-18,-22,?ins(22;3),+mar[3]/42,XY,+der(1)t(1;16),del(2),der(3)t(3;15),?+del(4),-5,-6,der(7)t(2;7;16),der(12)t(5;12),-13,-13, | not discernible                                           | 53               | adv                   | 4.1       | DA1                    | yes | salvage              | yes     | 6.4         | deceased                   | negative                                          | negative                                        |                                       |
| UPN07              | M      | 38-45,XY,del(1)(?q21),ins(1;4)(q?21;?),der(3)(3qter->3p21::?17q11.2->?17q21::?6->?6),t(5;17)(p10;q10),del(6)t(6;12)(p21;?),der(6)t(6;17)(p21;?),del(7)t(7;17)(p13;?)t(7;3;7)(p21;q?22),+8,i(8)(q10)+1-2,-16,-17[cp14]/46,XY[1]                                 | not discernible                                           | 51               | adv                   | 43.24     | DA1                    | no  | -                    | no      | 2.4         | deceased                   | negative                                          | negative                                        |                                       |
| UPN08              | M      | 46,XY,der(5)del(5)(q31)t(4;5)(?;3)[2]/46,XY,der(5)del(5)(q31)t(4;5)(?;q31)[6]                                                                                                                                                                                  | not discernible                                           | 20               | adv                   | 34.2      | DA1, DA2               | no  | -                    | no      | 1.6         | deceased                   | negative                                          | negative                                        |                                       |
| UPN09              | M      | 46-49,XY,del(4)(q13),add(7)(q11),der(17;18)(q10;q10),der(21)t(14;21)(q12;q11),+mar1-3[cp16]/46-49,XY,+19,der(21)t(14;21)q22;q11,+22[cp4]                                                                                                                       | negative                                                  | 55               | adv                   | 3.7       | DA1                    | yes | -                    | no      | 1.2         | deceased                   | large monoallelic deletion (TET2 copy number < 2) | negative                                        | monoallelic                           |
| UPN10              | F      | 46,XX,add(4)(q31),del(4)(q24q28),-5,del(7)(q21q35),add(12)(p11),-17,-20,+1-2mar[13]/45,idem,-3,del(4)(q24q28),del(8)(q12q13),-add(12)(p11,add(18)(q12)[2]                                                                                                      | deletion 4q24                                             | 48               | adv                   | 4.6       | DA1                    | yes | post-CR              | no      | 100.6       | alive                      | large monoallelic deletion (TET2 copy number < 2) | negative                                        | monoallelic                           |
| UPN11              | M      | 47,XY,del(3)(p14),der(4)t(4;5)(q26;?),der(5)t(5;12)(q14;?),der(6;21)(q10;q10),der(6)ins(6;21)(q11;q11q22),t(6;21)(p25;q11),der(7)t(7;12)(q11;q?),der(12)t(7;12)(?;q21),t(4;7)(?;?),r(21)ins(21;18),+r(21)ins(21;18)[cp13]/46,XY[3]                             | not discernible                                           | 53               | adv                   | 2.41      | DA1                    | yes | salvage              | yes     | 4.7         | deceased                   | negative                                          | negative                                        |                                       |
| UPN12              | M      | 47,XY,+21[12]/47,XY,+21,del(4)(q?)3/47,XY,del(13)(q?)5/47,XY,+21,del(4)(q?),del(13)(q?)1]                                                                                                                                                                      | not discernible                                           | 45               | fav                   | 277       | DA1, DA2               | yes | salvage              | yes     | 131.8       | alive                      | negative                                          | negative                                        |                                       |

|       |   |                                                                                                                                                           |                 |    |     |      |                 |     |         |     |      |          |                                                                                     |                         |             |
|-------|---|-----------------------------------------------------------------------------------------------------------------------------------------------------------|-----------------|----|-----|------|-----------------|-----|---------|-----|------|----------|-------------------------------------------------------------------------------------|-------------------------|-------------|
| UPN13 | F | 47-49,XX,del(1)(p13p22),-4,del(5)(q13q33),+8,+8,add(11)(q2?3),der(12)t(4;12)(q21;p1?3),-13,-14,?der(16),-17,-18,-19,+3-7mar[cp10]                         | monosomy 4      | 72 | adv | 9    | DA1             | no  | -       | no  | 0.3  | deceased | negative                                                                            | negative                |             |
| UPN14 | M | 46,XY,t(4;14)(q11;q32)[12]/46,XY[1]                                                                                                                       | negative        | 64 | int | 5.9  | DA1, DA2, MAMAC | yes | -       | yes | 66.7 | deceased | negative                                                                            | negative                |             |
| UPN15 | M | 46,XY,t(4;21)(q11;q11)[23]                                                                                                                                | negative        | 34 | int | 21.7 | MAV, MAMAC      | yes | post-CR | no  | 94.4 | alive    | negative                                                                            | negative                |             |
| UPN16 | F | 45,XX,?(4;10)(p11;p15),del(5)(q13q33),-7,del(12)(p13)[15]                                                                                                 | negative        | 65 | adv | 43   | DA1             | no  | -       | no  | 4.6  | deceased | negative                                                                            | negative                |             |
| UPN17 | M | 45-52,XY,der(1)t(1;3)(p22;p11),der(3)t(1;3;5)(p22;p11;q11),del(6)(q21),?del(8)(q22),-12,del(13)(q13q22),der(20)t(4;20)(q13;q11),+mar,inc[cp30]            | negative        | 73 | adv | 2.1  | DA1             | no  | -       | no  | 2.4  | deceased | negative                                                                            | negative                |             |
| UPN18 | M | 43-44,XY,del(1)(q32),der(3)(p?),del(4)(q?),del(5)(q13q31),-7,add(8)(p23),i(11)(q10),add(17)(q25),add(22)(q13),add(22)(q13),inc[cp27]                      | not discernible | 74 | adv | 28.9 | DA1             | no  | -       | no  | 0.6  | deceased | large monoallelic deletion (TET2 copy number < 2)                                   | negative                | monoallelic |
| UPN19 | F | 46,XX,der(4)(q31),del(9)(q13q22),-12,del(13)(q14q22),der(14)(q13),del(20)(q11),+mar[cp19]/46,XX[2]                                                        | negative        | 62 | adv | 1.6  | DA1             | yes | -       | yes | 21.3 | deceased | negative                                                                            | negative                |             |
| UPN20 | F | 46,XX,t(4;12)(q1?1;p1?2)[13]/46,XX[4]                                                                                                                     | negative        | 65 | int | 3.08 | DA1, DA2        | no  | -       | no  | 2.7  | deceased | negative                                                                            | negative                |             |
| UPN21 | F | 47,XX,+4[22]                                                                                                                                              | trisomy 4       | 74 | fav | 9    | DA1, DA2, MAMAC | yes | -       | yes | 6    | deceased | trisomy 4 plus LOH affecting most of the long arm, including TET2 (copy number > 2) | negative                |             |
| UPN22 | F | 47,XX,+4[8]/48,XX,+4,+4[7]/48,XX,+4,+8[4]/50,XX,+4,+8,+13,+19[1]                                                                                          | trisomy 4       | 68 | fav | 30.8 | DA1             | no  | -       | no  | 0.8  | deceased | trisomy 4                                                                           | negative                |             |
| UPN23 | M | 53,XY,+4,+6,+8,+9,add(17)(q25),+18,+21,+21[26]/46,XY[2]                                                                                                   | trisomy 4       | 18 | adv | 5.3  | MAV             | yes | post-CR | yes | 7.8  | deceased | trisomy 4                                                                           | negative                |             |
| UPN24 | F | 49,XX,+4,+8,t(10;11)(p13;q14),+12[10]                                                                                                                     | trisomy 4       | 53 | adv | 171  | MAV             | no  | -       | no  | 0.8  | deceased | trisomy 4                                                                           | negative                |             |
| UPN25 | M | 48,XY,+4,-6,+8,+mar[9]/46,XY[21]                                                                                                                          | trisomy 4       | 63 | adv | 14.5 | MAV, MAMAC      | yes | -       | yes | 32.9 | deceased | trisomy 4 plus LOH affecting most of the long arm, including TET2 (copy number > 2) | c.4133G>A, p.Cys1378Tyr | biallelic   |
| UPN26 | F | 47,XX,+4,t(8;21)(q22;q22)[9]/46,XX,t(8;21)(q22;q22)[18]                                                                                                   | trisomy 4       | 52 | fav | 34.8 | MAV, MAMAC      | yes | -       | yes | 17.7 | deceased | negative                                                                            | negative                |             |
| UPN27 | F | 47,XX,+4[18]/46,XX[2]                                                                                                                                     | trisomy 4       | 64 | fav | 1.2  | DA1, DA2        | yes | salvage | yes | 22.1 | deceased | trisomy 4                                                                           | negative                |             |
| UPN28 | M | 47,XY,+4[30]                                                                                                                                              | trisomy 4       | 73 | int | 36.3 | DA1             | yes | -       | no  | 62   | deceased | trisomy 4 with a focal deletion affecting TET2 (copy number < 2)                    | negative                | monoallelic |
| UPN29 | F | 46,XX,t(9;11)(p21-22;q23)[14]/49,XX,+4,+8,t(9;11)(p21-22;q23),+12[2]                                                                                      | trisomy 4       | 39 | adv | 212  | DA1             | no  | -       | no  | 0.1  | deceased | negative                                                                            | negative                |             |
| UPN30 | F | 47,XX,+8[1]/47,der(3)del(3)(p13)ins(3;12)(q21;q13q24.1),del(4)(q2?),+8,der(12)del(12)(q13q24.1)ins(12;4)(q13;?) [21]/47,XX,idem,?add(13)(q34)[2]/46,XX[7] | not discernible | 75 | adv | 4.7  | none            | no  | -       | no  | 23.8 | deceased | focal monoallelic deletion                                                          | c.3646C>T, p.Arg1216*   | biallelic   |

\* Risk category according to European LeukaemiaNet (ELN). fav, favourable; int, intermediate; adv, adverse.

<sup>b</sup> Remission-induction treatment regime(s) administered. DA, daunorubicin and Ara-C; MAC, mitoxantrone and Ara-C; MAMAC, amsacrine and Ara-C; MAV, mitoxantrone, Ara-C and VP-16; AZA, 5'-Azacytidine

<sup>c</sup> Patients who received allograft stem cell transplant (ALL-SCT) either after achieving CR (post-CR) or as salvage therapy after relapse (salvage).

**Table S8. Clinical characteristics and demographics of AML patients with *TET2* mutation enrolled in the PETHEME FLUGAZA phase 3 clinical trial.**

| Patient ID            | Gender | Age at diagnosis | ECOG score <sup>a</sup> | ELN risk <sup>b</sup> | Treatment <sup>c</sup> | CR  | OS (days) | Status (at last follow-up) | Cause of death           | <i>TET2</i> loss of function mutation status | <i>TP53</i> mutation  |
|-----------------------|--------|------------------|-------------------------|-----------------------|------------------------|-----|-----------|----------------------------|--------------------------|----------------------------------------------|-----------------------|
| UPN01<br>(index case) | M      | 76               | 2                       | fav                   | DA, AZA                | Yes | 850       | deceased                   | Progression              | biallelic                                    | wild-type             |
| UPN31                 | M      | 81               | 3                       | adv                   | AZA                    | Yes | 767       | deceased                   | Progression              | biallelic                                    | wild-type             |
| UPN32                 | M      | 67               | 2                       | fav                   | AZA                    | Yes | 588       | deceased                   | Progression              | monoallelic                                  | wild-type             |
| UPN33                 | M      | 70               | 3                       | adv                   | AZA                    | Yes | 579       | deceased                   | Progression              | biallelic                                    | c.641A>G, p.His214Arg |
| UPN34                 | M      | 72               | 1                       | adv                   | AZA                    | No  | 523       | deceased                   | Progression              | monoallelic                                  | wild-type             |
| UPN35                 | M      | 77               | 0                       | adv                   | AZA                    | Yes | 517       | deceased                   | Progression              | monoallelic                                  | wild-type             |
| UPN36                 | M      | 83               | 2                       | adv                   | AZA                    | No  | 507       | deceased                   | Progression              | monoallelic                                  | wild-type             |
| UPN37                 | F      | 73               | 0                       | int                   | AZA                    | No  | 470       | deceased                   | Progression              | monoallelic                                  | wild-type             |
| UPN38                 | M      | 73               | 0                       | int                   | AZA                    | Yes | 435       | deceased                   | Cardiovascular disease   | monoallelic                                  | wild-type             |
| UPN39                 | F      | 83               | 3                       | adv                   | AZA                    | Yes | 373       | deceased                   | Progression              | monoallelic                                  | wild-type             |
| UPN40                 | M      | 66               | 1                       | adv                   | AZA                    | Yes | 356       | deceased                   | Progression              | monoallelic                                  | wild-type             |
| UPN41                 | M      | 77               | 1                       | fav                   | AZA                    | Yes | 344       | deceased                   | Progression              | monoallelic                                  | wild-type             |
| UPN42                 | M      | 70               | 2                       | fav                   | AZA                    | No  | 183       | deceased                   | Progression              | monoallelic                                  | wild-type             |
| UPN43                 | F      | 86               | 2                       | int                   | AZA                    | No  | 125       | deceased                   | Infection                | monoallelic                                  | wild-type             |
| UPN44                 | M      | 78               | 0                       | adv                   | AZA                    | No  | 114       | alive                      | -                        | monoallelic                                  | wild-type             |
| UPN45                 | M      | 71               | 1                       | adv                   | AZA                    | No  | 106       | deceased                   | Progression              | monoallelic                                  | c.761T>A, p.Ile254Asn |
| UPN46                 | F      | 79               | 1                       | adv                   | AZA                    | No  | 82        | deceased                   | Cardiovascular disease   | monoallelic                                  | c.338T>C, p.Phe113Ser |
| UPN47                 | M      | 79               | 3                       | adv                   | AZA                    | No  | 62        | deceased                   | Progression              | biallelic                                    | wild-type             |
| UPN48                 | M      | 71               | 1                       | adv                   | AZA                    | NA  | 56        | deceased                   | Infection                | monoallelic                                  | wild-type             |
| UPN49                 | M      | 73               | 2                       | adv                   | AZA                    | No  | 52        | deceased                   | Hemorrhagic complication | monoallelic                                  | c.920-2A>G, p.?       |
| UPN50                 | F      | 87               | 3                       | adv                   | AZA                    | No  | 26        | deceased                   | Progression              | monoallelic                                  | wild-type             |
| UPN51                 | M      | 70               | 1                       | int                   | FLUGA                  | Yes | 1308      | alive                      | -                        | monoallelic                                  | wild-type             |
| UPN52                 | M      | 71               | 0                       | int                   | FLUGA                  | No  | 1023      | deceased                   | Progression              | monoallelic                                  | wild-type             |
| UPN53                 | M      | 70               | 0                       | int                   | FLUGA                  | No  | 862       | deceased                   | Progression              | monoallelic                                  | wild-type             |
| UPN54                 | M      | 77               | 1                       | adv                   | FLUGA                  | No  | 620       | deceased                   | Lung cancer              | monoallelic                                  | wild-type             |
| UPN55                 | F      | 73               | 2                       | int                   | FLUGA                  | Yes | 551       | deceased                   | Progression              | monoallelic                                  | wild-type             |
| UPN56                 | M      | 76               | 1                       | fav                   | FLUGA                  | Yes | 473       | deceased                   | Hemorrhagic complication | monoallelic                                  | wild-type             |

|       |   |    |   |     |       |     |     |          |                          |             |                                                       |
|-------|---|----|---|-----|-------|-----|-----|----------|--------------------------|-------------|-------------------------------------------------------|
| UPN57 | M | 69 | 1 | fav | FLUGA | Yes | 420 | deceased | Progression              | monoallelic | wild-type                                             |
| UPN58 | F | 76 | 0 | adv | FLUGA | Yes | 388 | deceased | Progression              | monoallelic | wild-type                                             |
| UPN59 | M | 80 | 0 | adv | FLUGA | Yes | 362 | deceased | Possible stroke          | monoallelic | wild-type                                             |
| UPN60 | F | 80 | 1 | adv | FLUGA | Yes | 354 | deceased | Progression              | monoallelic | wild-type                                             |
| UPN61 | F | 67 | 1 | int | FLUGA | Yes | 267 | deceased | Progression              | monoallelic | wild-type                                             |
| UPN62 | F | 73 | 1 | adv | FLUGA | Yes | 220 | deceased | Progression              | monoallelic | wild-type                                             |
| UPN63 | M | 72 | 0 | fav | FLUGA | No  | 203 | deceased | Progression              | monoallelic | wild-type                                             |
| UPN64 | F | 65 | 1 | int | FLUGA | No  | 159 | deceased | Progression              | monoallelic | wild-type                                             |
| UPN65 | M | 80 | 1 | adv | FLUGA | No  | 155 | deceased | Progression              | monoallelic | c.740A>T,<br>p.Asn247Ile                              |
| UPN66 | F | 70 | 1 | int | FLUGA | No  | 141 | deceased | Progression              | monoallelic | wild-type                                             |
| UPN67 | F | 82 | 1 | adv | FLUGA | No  | 126 | deceased | Progression              | monoallelic | c.920-2A>G, p.?                                       |
| UPN68 | M | 72 | 0 | adv | FLUGA | No  | 111 | deceased | Progression              | biallelic   | wild-type                                             |
| UPN69 | F | 67 | 2 | adv | FLUGA | No  | 100 | deceased | Progression              | monoallelic | wild-type                                             |
| UPN70 | M | 70 | 2 | adv | FLUGA | No  | 94  | deceased | Infection                | monoallelic | wild-type                                             |
| UPN71 | M | 76 | 0 | int | FLUGA | No  | 68  | deceased | Progression              | monoallelic | wild-type                                             |
| UPN72 | M | 81 | 0 | int | FLUGA | NA  | 53  | deceased | Myocardial infarction    | monoallelic | wild-type                                             |
| UPN73 | F | 71 | 2 | int | FLUGA | No  | 45  | deceased | Progression              | biallelic   | wild-type                                             |
| UPN74 | F | 76 | 1 | adv | FLUGA | No  | 40  | deceased | Infection                | monoallelic | c.568C>A,<br>p.Pro190Thr                              |
| UPN75 | F | 82 | 1 | adv | FLUGA | Yes | 37  | deceased | Infection                | monoallelic | c.818G>A,<br>p.Arg273His;<br>c.997delC,<br>p.Arg333fs |
| UPN76 | M | 81 | 1 | adv | FLUGA | NA  | 31  | deceased | Infection                | monoallelic | wild-type                                             |
| UPN77 | F | 71 | 0 | fav | FLUGA | NA  | 19  | deceased | Hemorrhagic complication | monoallelic | wild-type                                             |
| UPN78 | M | 71 | 1 | int | FLUGA | NA  | 17  | deceased | Hemorrhagic complication | biallelic   | wild-type                                             |
| UPN79 | F | 80 | 1 | fav | FLUGA | NA  | 9   | deceased | Progression              | monoallelic | wild-type                                             |
| UPN80 | M | 82 | 1 | adv | FLUGA | No  | 3   | deceased | Tumor lysis syndrome     | monoallelic | c.818G>A,<br>p.Arg273His                              |

<sup>a</sup>Performance status according to European Cooperative Oncology Group (ECOG).

<sup>b</sup>Risk category according to European LeukaemiaNet (ELN). fav, favourable; int, intermediate; adv, adverse.

<sup>c</sup> Remission-induction treatment regime(s) administered. DA, daunorubicin and Ara-C; AZA, 5'-Azacytidine; FLUGA, low-dose Ara-C and fludarabine

**Table S9. Primer sequences and PCR reaction conditions for Sanger sequencing of genes of interest.**

| <b>Amplicon</b>                                                                                                                                                                                                                                                                                    | <b>Primer sequences<sup>a</sup></b>                               | <b>PCR reaction conditions<sup>b</sup></b>           |
|----------------------------------------------------------------------------------------------------------------------------------------------------------------------------------------------------------------------------------------------------------------------------------------------------|-------------------------------------------------------------------|------------------------------------------------------|
| <i>TET2</i> exon 3                                                                                                                                                                                                                                                                                 | F 5'-GCTTTCAAGAACAGGAGCAGA-3' *<br>R 5'-CAGGCATGTGGCTTGCATC-3'    | 35 cycles:<br>D 95°C 25s<br>A 60°C 35s<br>E 72°C 45s |
| <i>TET2</i> exon 6                                                                                                                                                                                                                                                                                 | F 5'-TGCAAGTGACCCTTGTTTTG-3' *<br>R 5'-TACCGAGACGCTGAGGAAAT-3'    | 36 cycles:<br>D 95°C 25s<br>A 55°C 35s<br>E 72°C 65s |
| <i>NPM1</i> exon 11                                                                                                                                                                                                                                                                                | F 5'-AACTCTCTGGTGGTAGAATGAAA-3'<br>R 5'-TGAGAACTTTCCTACCGTGT-3' * | 36 cycles:<br>D 95°C 25s<br>A 55°C 35s<br>E 72°C 65s |
| <i>FLT3</i> exon 14                                                                                                                                                                                                                                                                                | F 5'-ACAGGGACATTGCCTGATTGT-3'<br>R 5'-GGTTGACACCCCAATCCACT-3' *   | 35 cycles:<br>D 95°C 25s<br>A 60°C 35s<br>E 72°C 45s |
| <sup>a</sup> F, forward; R, reverse.<br><sup>b</sup> initial denaturation was performed at 95°C for 2 min and the last cycle was followed by a final extension step at 72°C for 5 min in all cases. D, denaturation; A, annealing; E, extension.<br>* indicates primer used for Sanger sequencing. |                                                                   |                                                      |
